# Supplementary material
Source: publisher figshare collection journal article supplement (https://acs.figshare.com/ndownloader/files/5168167)
Supplement: Supplementary file 1 [file 5168167]

## Supplemental information

### Experimental

**A:** 2-hydroxyisophthalic acid was synthesized from 2-methoxyisophthalic acid (Aldrich) by demethylation with one eq.  $\text{BBr}_3$  in  $\text{CH}_2\text{Cl}_2$  and stirred for 24 hours. Solution was quenched with 0.1 N NaOH and neutralized with 0.1 N HCl. Product was extracted from water with ether. The solvent was removed to leave 2-hydroxyisophthalic acid. 2,3-dihydroxybenzoic acid was purchased from Acros.

**B:** Solutions (0.1-0.3 M) of ligand:Be were prepared in ratios(ligand:Be) of 2:1 HIPA: (1), 1:1 (2), 1:2 (3), and 1:3 (4) and DHBA: (5), 1:1 (6), 1:2 (7), and 1:3 (8). The pH was adjusted with KOH in the range from 4 – 9. All Be compounds were soluble except 4 and 8 which  $(\text{Be}(\text{OH})_2)$  precipitate was present in solution above pH 5.8. Raman data for the HIPA:Be species was similar to that of free HIPA.

(3)  $^9\text{Be}$  NMR (pH 7.0):  $\delta$  3.40 ( $w_{1/2} = 42.2$  hz):  $^9\text{Be}$  NMR were similar in 1 and 2.

(7)  $^9\text{Be}$  NMR (pH 7.0):  $\delta$  2.65 ( $w_{1/2} = 55.1$  hz) and 4.52 ( $w_{1/2} = 59.0$  hz):  $^9\text{Be}$  NMR were similar in 5 and 6.

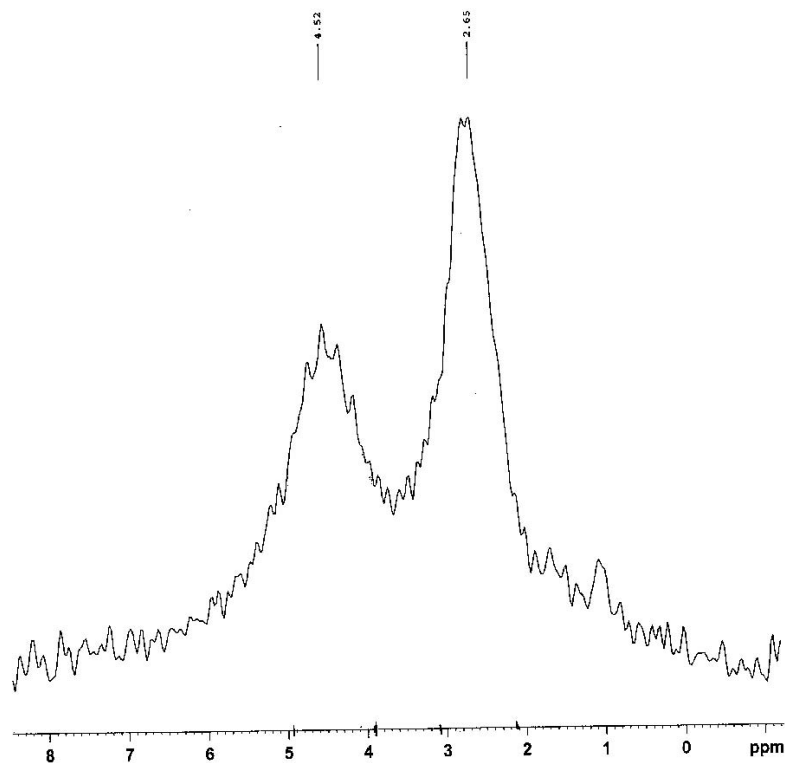

$^9\text{Be}$  NMR of DHBA:Be 1:2 at pH = 7

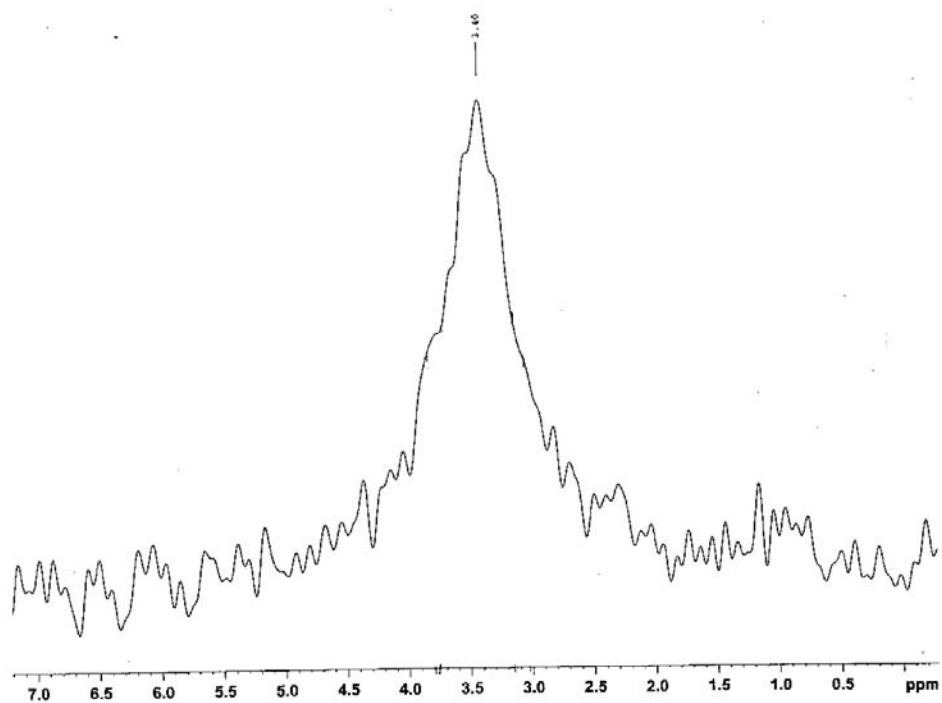

$^9\text{Be}$  NMR of HIPA:Be 1:2 at pH = 6.6

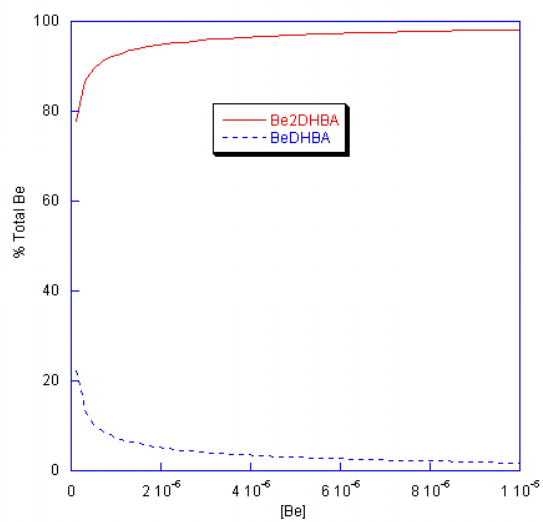

Speciation of DHBA with beryllium at low concentrations
